# Supplementary material for: Synthesis and magnetic properties of two Mn-based coordination polymers constructed by a mixed-ligand strategy
Source: Royal Society of Chemistry journal article supplement (doi:10.1039/d0ce01178a), 2020-01-01
Supplement: d0ce01178a1.pdf [file d0ce01178a1.pdf]

## Supporting Information

### Synthesis and magnetic properties of Two Mn-based coordination polymers constructed by mixed-ligand strategy

Yujuan Zhang<sup>a</sup>, Lingling Gao<sup>b</sup>, Wendi Zhou<sup>a</sup>, Xiaoqin Wei<sup>\*b</sup>, Tuoping Hu<sup>\*a</sup>

#### Comment S1: X-ray crystallography

Intensity data collection was carried out on a Siemens SMART diffractometer equipped with a CCD detector using Mo- $K\alpha$  monochromatized radiation ( $\lambda=0.71073$  Å). The absorption correction was based on multiple and symmetry-equivalent reflections in the data set using the SADABS program [1]. The structures were solved by direct methods and refined by full-matrix least-squares using the SHELXTL package [2]. Crystallographic data for complexes **1** and **2** is given in Table S1. Selected bond lengths and angles for **1** and **2** are listed in Table S2.

#### Comment S2: Theoretical calculation of spin-only value

The theoretical spin-only value ( $\chi_M T$ , cm<sup>3</sup> K mol<sup>-1</sup>) was calculated according to the following Eqs. S1.

$$\chi_M T = 0.1253n(n + 2) \dots\dots\dots(S1)$$

where  $n$  represented the single electron numbers (For Mn<sup>2+</sup> ions,  $n=5$ ).

#### Refs:

- [1] H.L. Buckley and W.A. Chomitz, *Chem Commun.*, 2012, 48, 10766-107768.
- [2] G.M. Sheldrick, *Acta Cryst A.*, 2008, 64, 112-122.

Table S1. Crystallographic data for **1** and **2**.

| Complex                                                           | <b>1</b>                                                                       | <b>2</b>                                                                       |
|-------------------------------------------------------------------|--------------------------------------------------------------------------------|--------------------------------------------------------------------------------|
| Formula                                                           | C <sub>29</sub> H <sub>28</sub> Mn <sub>2</sub> N <sub>2</sub> O <sub>14</sub> | C <sub>41</sub> H <sub>28</sub> Mn <sub>2</sub> N <sub>4</sub> O <sub>12</sub> |
| Formula weight                                                    | 738.41                                                                         | 878.55                                                                         |
| Crystal system                                                    | Monoclinic                                                                     | Monoclinic                                                                     |
| Space group                                                       | <i>P</i> 2 <sub>1</sub> /n                                                     | <i>P</i> 2 <sub>1</sub> /c                                                     |
| <i>a</i> (Å)                                                      | 13.2419 (7)                                                                    | 15.6867 (16)                                                                   |
| <i>b</i> (Å)                                                      | 15.4637 (7)                                                                    | 14.8573 (15)                                                                   |
| <i>c</i> (Å)                                                      | 18.8598 (9)                                                                    | 18.9889 (19)                                                                   |
| $\alpha$ (°)                                                      | 90                                                                             | 90                                                                             |
| $\beta$ (°)                                                       | 107.908 (2)                                                                    | 93.799 (4)                                                                     |
| $\gamma$ (°)                                                      | 90                                                                             | 90                                                                             |
| <i>V</i> (Å <sup>3</sup> )                                        | 3674.8 (3)                                                                     | 4415.9 (8)                                                                     |
| <i>Z</i>                                                          | 4                                                                              | 4                                                                              |
| <i>D</i> <sub>calcd</sub> (Mg/m <sup>3</sup> )                    | 1.335                                                                          | 1.321                                                                          |
| $\mu$ (mm <sup>-1</sup> )                                         | 0.749                                                                          | 0.634                                                                          |
| <i>F</i> (000)                                                    | 1512                                                                           | 1792                                                                           |
| <i>R</i> <sub>int</sub>                                           | 0.1895                                                                         | 0.0423                                                                         |
| <i>R</i> <sub>1</sub> [ <i>I</i> > 2σ( <i>I</i> )] <sup>a</sup>   | 0.0685                                                                         | 0.0403                                                                         |
| w <i>R</i> <sub>2</sub> [ <i>I</i> > 2σ( <i>I</i> )] <sup>b</sup> | 0.1391                                                                         | 0.0994                                                                         |
| Gof                                                               | 1.005                                                                          | 1.035                                                                          |
| CCDC number                                                       | 1974347                                                                        | 1956742                                                                        |

Table S2. Selected bond lengths (Å) and angles (°) for **1** and **2**.

| Complex 1                                                                                  |            |                                              |            |                                               |            |
|--------------------------------------------------------------------------------------------|------------|----------------------------------------------|------------|-----------------------------------------------|------------|
| Mn(1)-O(1)                                                                                 | 2.432(3)   | Mn(1)-O(3) <sup>#1</sup>                     | 2.282(3)   | Mn(2)-O(7)                                    | 2.163(3)   |
| Mn(1)-O(2)                                                                                 | 2.306(3)   | Mn(1)-O(4) <sup>#1</sup>                     | 2.258(3)   | Mn(2)-O(8)                                    | 2.197(3)   |
| Mn(1)-O(5)                                                                                 | 2.126(3)   | Mn(2)-O(1) <sup>#1</sup>                     | 2.230(3)   | Mn(2)-O(9)                                    | 2.169(3)   |
| Mn(2)-O(6)                                                                                 | 2.156(3)   | Mn(2)-O(3) <sup>#1</sup>                     | 2.185(3)   | Mn(1)-O(12) <sup>#2</sup>                     | 2.126(3)   |
| O(2)-Mn(1)-O(1)                                                                            | 55.19(10)  | O(5)-Mn(1)-O(1)                              | 88.94(11)  | O(5)-Mn(1)-O(2)                               | 87.15(12)  |
| O(4) <sup>#1</sup> -Mn(1)-O(2)                                                             | 90.866(13) | O(4) <sup>#1</sup> -Mn(1)-O(3) <sup>#1</sup> | 57.63(13)  | O(3) <sup>#1</sup> -Mn(1)-O(1)                | 153.98(10) |
| O(4) <sup>#1</sup> -Mn(1)-O(1)                                                             | 111.64(11) | O(5)-Mn(1)-O(4) <sup>#1</sup>                | 153.23(12) | O(3) <sup>#1</sup> -Mn(1)-O(2)                | 99.52(10)  |
| O(12) <sup>#2</sup> -Mn(1)-O(1)                                                            | 81.30(11)  | O(5)-Mn(1)-O(3) <sup>#1</sup>                | 96.39(11)  | O(12) <sup>#2</sup> -Mn(1)-O(3) <sup>#1</sup> | 118.85(12) |
| O(12) <sup>#2</sup> -Mn(1)-O(4) <sup>#1</sup>                                              | 86.88(14)  | O(12) <sup>#2</sup> -Mn(1)-O(2)              | 131.89(12) | O(12) <sup>#2</sup> -Mn(1)-O(5)               | 113.98(13) |
| O(6)-Mn(2)-O(7)                                                                            | 86.79(13)  | O(6)-Mn(2)-O(9)                              | 83.42(12)  | O(6)-Mn(2)-O(8)                               | 95.87(13)  |
| O(6)-Mn(2)-O(1) <sup>#1</sup>                                                              | 164.72(12) | O(6)-Mn(2)-O(3) <sup>#1</sup>                | 89.02(11)  | O(7)-Mn(2)-O(1) <sup>#1</sup>                 | 92.48(12)  |
| O(7)-Mn(2)-O(3) <sup>#1</sup>                                                              | 88.67(12)  | O(7)-Mn(2)-O(8)                              | 174.77(14) | O(7)-Mn(2)-O(9)                               | 93.79(13)  |
| O(3) <sup>#1</sup> -Mn(2)-O(8)                                                             | 86.89(12)  | O(3) <sup>#1</sup> -Mn(2)-O(1) <sup>#1</sup> | 106.22(11) | O(8)-Mn(2)-O(1) <sup>#1</sup>                 | 86.13(12)  |
| O(9)-Mn(2)-O(8)                                                                            | 90.99(13)  | O(9)-Mn(2)-O(1) <sup>#1</sup>                | 81.40(12)  | O(9)-Mn(2)-O(3) <sup>#1</sup>                 | 171.90(12) |
| Symmetry codes: #1 -x+3/2,y+1/2,-z+1/2, #2 x-1/2,-y+1/2,z-1/2.                             |            |                                              |            |                                               |            |
| Complex 2                                                                                  |            |                                              |            |                                               |            |
| Mn(1)-O(1)                                                                                 | 2.1586(14) | Mn(1)-O(7)                                   | 2.2437(15) | Mn(1)-O(1) <sup>#1</sup>                      | 2.2900(15) |
| Mn(1)-O(2) <sup>#1</sup>                                                                   | 2.5393(14) | Mn(1)-O(5) <sup>#2</sup>                     | 2.1904(15) | Mn(1)-O(6) <sup>#2</sup>                      | 2.3270(17) |
| Mn(1)-O(8) <sup>#1</sup>                                                                   | 2.2081(14) | Mn(2)-O(2)                                   | 2.3160(14) | Mn(2)-O(3)                                    | 2.1481(14) |
| Mn(2)-O(12)                                                                                | 2.2374(16) | Mn(2)-O(4) <sup>#3</sup>                     | 2.1666(14) | Mn(2)-N(1)                                    | 2.2055(16) |
| Mn(2)-N(4) <sup>#4</sup>                                                                   | 2.2136(17) | O(1)-Mn(1)-O(6) <sup>#2</sup>                | 98.27(6)   | O(1)-Mn(1)-O(1) <sup>#1</sup>                 | 87.69(5)   |
| O(1)-Mn(1)-O(7)                                                                            | 82.10(6)   | O(1)-Mn(1)-O(2) <sup>#1</sup>                | 140.01(5)  | O(1)-Mn(1)-O(5) <sup>#2</sup>                 | 138.02(6)  |
| O(1)-Mn(1)-O(8) <sup>#1</sup>                                                              | 82.63(5)   | O(1) <sup>#1</sup> -Mn(1)-O(2) <sup>#1</sup> | 53.47(5)   | O(1) <sup>#1</sup> -Mn(1)-O(6) <sup>#2</sup>  | 157.72(6)  |
| O(3)-Mn(2)-O(2)                                                                            | 100.85(5)  | O(3)-Mn(2)-N(1)                              | 99.91(6)   | O(3)-Mn(2)-O(12)                              | 171.30(6)  |
| O(3)-Mn(2)-O(4) <sup>#3</sup>                                                              | 91.59(5)   | O(4) <sup>#3</sup> -Mn(2)-N(1)               | 89.35(6)   | O(4) <sup>#3</sup> -Mn(2)-O(2)                | 167.09(5)  |
| O(4) <sup>#3</sup> -Mn(2)-N(4) <sup>#4</sup>                                               | 85.88(6)   | O(4) <sup>#3</sup> -Mn(2)-O(12)              | 88.46(6)   | O(5) <sup>#2</sup> -Mn(1)-O(2) <sup>#1</sup>  | 81.18(5)   |
| O(5) <sup>#2</sup> -Mn(1)-O(6) <sup>#2</sup>                                               | 57.20(6)   | O(5) <sup>#2</sup> -Mn(1)-O(1) <sup>#1</sup> | 128.56(5)  | O(5) <sup>#2</sup> -Mn(1)-O(8) <sup>#1</sup>  | 119.94(6)  |
| O(6) <sup>#2</sup> -Mn(1)-O(2) <sup>#1</sup>                                               | 114.48(6)  | O(7)-Mn(1)-O(2) <sup>#1</sup>                | 97.69(5)   | O(7)-Mn(1)-O(1) <sup>#1</sup>                 | 79.48(6)   |
| O(7)-Mn(1)-O(6) <sup>#2</sup>                                                              | 122.50(6)  | O(8) <sup>#1</sup> -Mn(1)-O(1) <sup>#1</sup> | 79.68(5)   | O(8) <sup>#1</sup> -Mn(1)-O(2) <sup>#1</sup>  | 81.34(5)   |
| O(8) <sup>#1</sup> -Mn(1)-O(7)                                                             | 154.56(5)  | O(8) <sup>#1</sup> -Mn(1)-O(6) <sup>#2</sup> | 79.83(6)   | O(12)-Mn(2)-O(2)                              | 79.76(6)   |
| N(1)-Mn(2)-O(2)                                                                            | 85.17(6)   | N(1)-Mn(2)-O(12)                             | 88.80(6)   | N(1)-Mn(2)-N(4) <sup>#4</sup>                 | 173.05(7)  |
| N(4) <sup>#4</sup> -Mn(2)-O(2)                                                             | 98.44(6)   | N(4) <sup>#4</sup> -Mn(2)-O(12)              | 86.02(7)   |                                               |            |
| Symmetry codes: #1 -x,-y+1,-z+1, #2 -x,y-1/2,-z+1/2, #3 -x,-y+2,-z+1, #4 x-1,-y+3/2,z-1/2. |            |                                              |            |                                               |            |

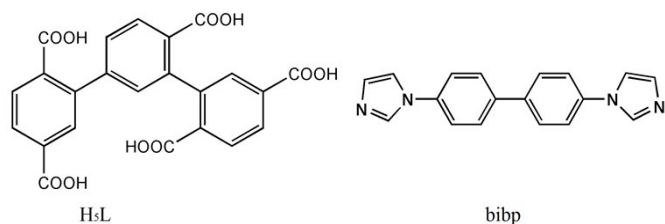

Scheme S1 Ligands  $\text{H}_3\text{L}$  and  $\text{bibp}$  used.

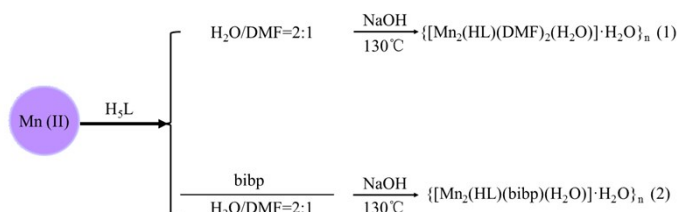

Scheme S2 Synthesis scheme of CPs **1** and **2**.

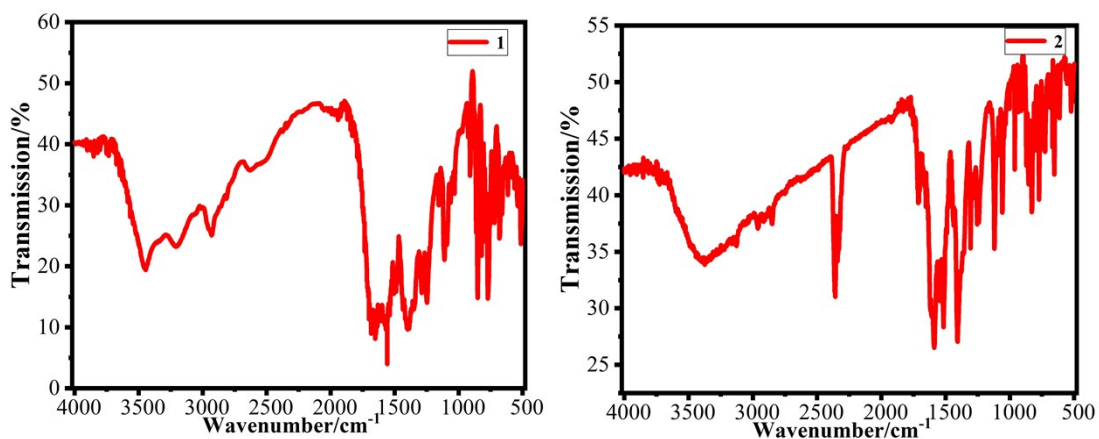

Fig. S1 IR spectra of CPs **1** and **2**.

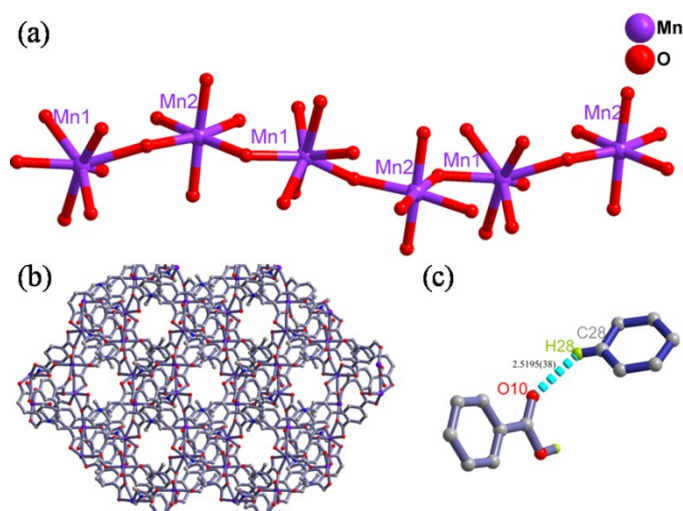

Fig. S2 (a) The 1D  $\{\text{MnO}\}$  chain of **1**. (b) The 2D layered structure in the direction of  $c$  axis for **1**.  
(c) The hydrogen bonding of **1**.

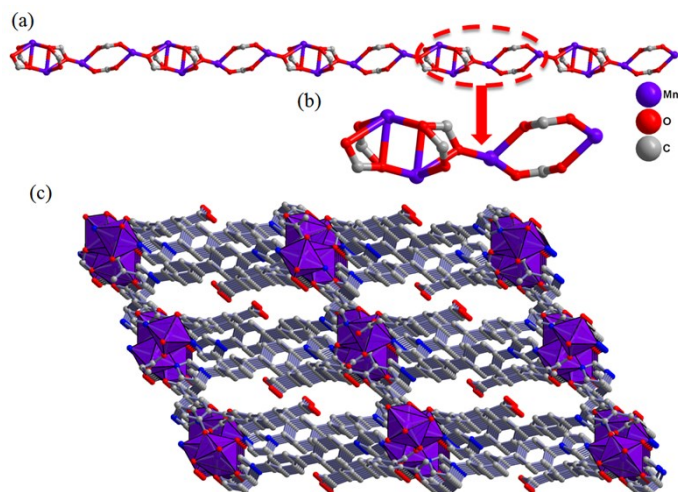

Fig. S3 (a) 1D paddle-wheel  $\{Mn_2O_4C_2\}$  chain of **2**; (b) paddle-wheel  $\{Mn_2O_4C_2\}$  of **2**; (c) 3D network framework of **2**.

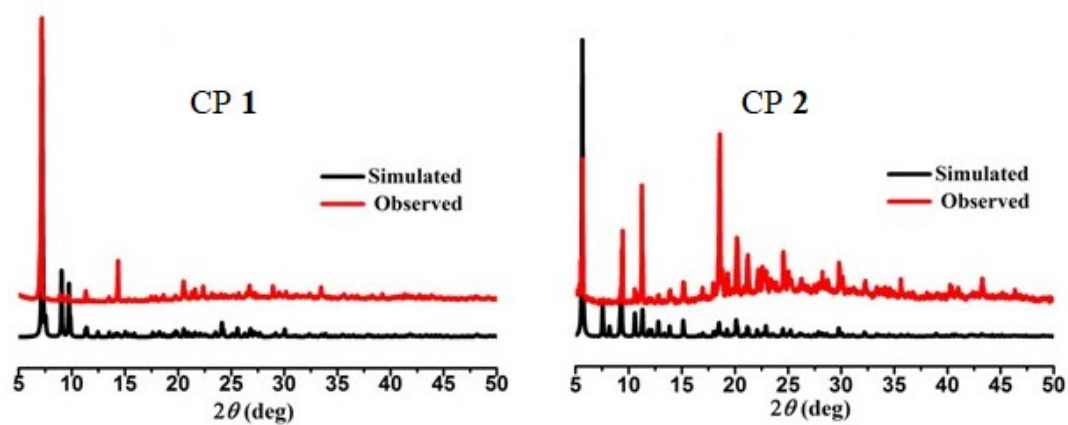

Fig. S4 PXRD patterns of CPs **1** and **2**. Dark: calculated from the X-ray single-crystal data; Red: observed for the as-synthesized samples.

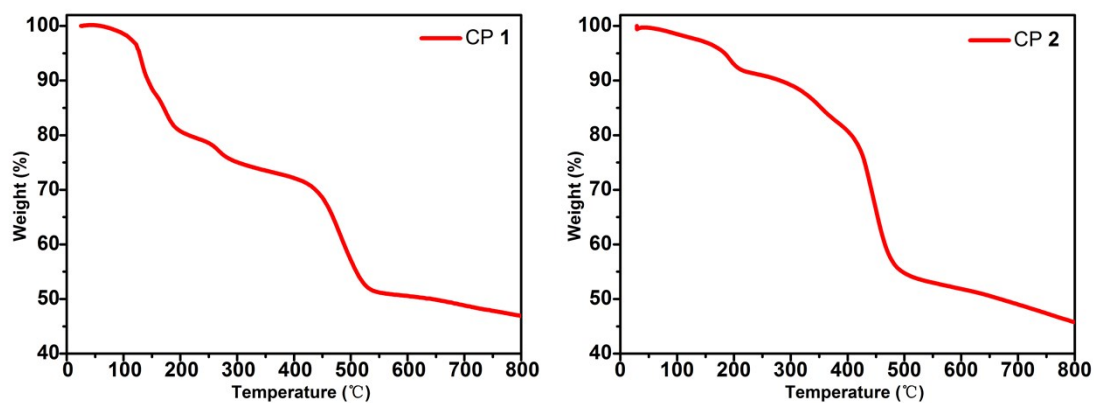

Fig. S5 TGA curves of **1** and **2**.
